# Supplementary material
Source: Springer Nature journal article supplement (https://www.springermedizin.de/resource/supplementary/13223_2013_401_MOESM3_ESM.pdf/9597834)
Supplement: MOESM3 [file 9597834]

## Supplementary file 3

### Vitamin C and common cold-induced asthma: a systematic review and statistical analysis

Submitted to: Allergy, Asthma & Clinical Immunology

R-program printouts (8 Oct 2013)

Harri Hemilä  
Department of Public Health  
University of Helsinki  
Helsinki  
Finland  
[harri.hemila@helsinki.fi](mailto:harri.hemila@helsinki.fi)  
<http://www.mv.helsinki.fi/home/hemila/>  
[http://www.mv.helsinki.fi/home/hemila/vitc\\_asthma.htm](http://www.mv.helsinki.fi/home/hemila/vitc_asthma.htm) (papers on vitC-asthma)

### Contents

Page

**2 Anah 1980: imputed data set**

Anah data for the negative binomial model, see supplementary file 2

**3 Anah**

Poisson distribution confidence intervals

**4 Anah: all asthma attacks**

Negative binomial model confidence intervals

**5 Anah: severe and moderate asthma attacks**

Negative binomial model confidence intervals

**6 Bucca 1989: reconstructed data set**

Bucca data set for the statistical analysis

See supplementary file 2 for the construction of the data set

The data is the log(PC20) levels

**7-9 Bucca 1989: Bucca's AOV calculations and correct paired t-test**

In the 1989 paper, Bucca et al. used the analysis of variance (AOV) to calculate the effect of vitamin C and to compare the "During Cold" and "After Recovery" days. However, the data are paired (4 measurements with the same person) and therefore paired t-test is correct. AOV corresponds to unpaired t-test

7 Comparison of baseline (pre) vs. post vitamin C on the "During Cold" day

8 Comparison of baseline (pre) vs. post vitamin C on the "After Recovery" day

9 Comparison of baseline (pre) values for the "During Cold" and "After Recovery" days

10 Interaction test: difference in vitamin C effect on the "During Cold" and "After Recovery" days

11 Correlations of pre and post vit C values between the two test days

12- Test of improvement of association when vitamin C effect is added to model

14- What can explain effect of vitamin C on the common cold day i.e. Cold\_VC

> # Imputed Anah data set: Group 1 is vitamin C, Group 0 is Placebo

> Anah

|    | Participant | Group | Severe | Moderate | Mild | SevMod | All |
|----|-------------|-------|--------|----------|------|--------|-----|
| 1  | 1           | 1     | 1      | 0        | 2    | 1      | 3   |
| 2  | 2           | 1     | 1      | 0        | 0    | 1      | 1   |
| 3  | 3           | 1     | 0      | 1        | 0    | 1      | 1   |
| 4  | 4           | 1     | 0      | 0        | 4    | 0      | 4   |
| 5  | 5           | 1     | 0      | 0        | 0    | 0      | 0   |
| 6  | 6           | 1     | 0      | 0        | 0    | 0      | 0   |
| 7  | 7           | 1     | 0      | 0        | 0    | 0      | 0   |
| 8  | 8           | 1     | 0      | 0        | 0    | 0      | 0   |
| 9  | 9           | 1     | 0      | 0        | 0    | 0      | 0   |
| 10 | 10          | 1     | 0      | 0        | 0    | 0      | 0   |
| 11 | 11          | 1     | 0      | 0        | 0    | 0      | 0   |
| 12 | 12          | 1     | 0      | 0        | 0    | 0      | 0   |
| 13 | 13          | 1     | 0      | 0        | 0    | 0      | 0   |
| 14 | 14          | 1     | 0      | 0        | 0    | 0      | 0   |
| 15 | 15          | 1     | 0      | 0        | 0    | 0      | 0   |
| 16 | 16          | 1     | 0      | 0        | 0    | 0      | 0   |
| 17 | 17          | 1     | 0      | 0        | 0    | 0      | 0   |
| 18 | 18          | 1     | 0      | 0        | 0    | 0      | 0   |
| 19 | 19          | 1     | 0      | 0        | 0    | 0      | 0   |
| 20 | 20          | 1     | 0      | 0        | 0    | 0      | 0   |
| 21 | 21          | 1     | 0      | 0        | 0    | 0      | 0   |
| 22 | 22          | 1     | 0      | 0        | 0    | 0      | 0   |
| 23 | 23          | 0     | 3      | 0        | 0    | 3      | 3   |
| 24 | 24          | 0     | 3      | 0        | 0    | 3      | 3   |
| 25 | 25          | 0     | 2      | 0        | 0    | 2      | 2   |
| 26 | 26          | 0     | 0      | 4        | 1    | 4      | 5   |
| 27 | 27          | 0     | 0      | 4        | 1    | 4      | 5   |
| 28 | 28          | 0     | 0      | 4        | 1    | 4      | 5   |
| 29 | 29          | 0     | 0      | 2        | 2    | 2      | 4   |
| 30 | 30          | 0     | 0      | 2        | 2    | 2      | 4   |
| 31 | 31          | 0     | 0      | 0        | 4    | 0      | 4   |
| 32 | 32          | 0     | 0      | 0        | 0    | 0      | 0   |
| 33 | 33          | 0     | 0      | 0        | 0    | 0      | 0   |
| 34 | 34          | 0     | 0      | 0        | 0    | 0      | 0   |
| 35 | 35          | 0     | 0      | 0        | 0    | 0      | 0   |
| 36 | 36          | 0     | 0      | 0        | 0    | 0      | 0   |
| 37 | 37          | 0     | 0      | 0        | 0    | 0      | 0   |
| 38 | 38          | 0     | 0      | 0        | 0    | 0      | 0   |
| 39 | 39          | 0     | 0      | 0        | 0    | 0      | 0   |
| 40 | 40          | 0     | 0      | 0        | 0    | 0      | 0   |
| 41 | 41          | 0     | 0      | 0        | 0    | 0      | 0   |

```
> # All Anah asthma attacks ** "Poisson.Test" program
```

```
> poisson.test(c(9, 35), c(22, 19))
```

```
Comparison of Poisson rates
```

```
data: c(9, 35) time base: c(22, 19)
```

```
count1 = 9, expected count1 = 23.61, p-value = 1.122e-05
```

```
alternative hypothesis: true rate ratio is not equal to 1
```

```
95 percent confidence interval:
```

```
0.09387772 0.47128869
```

```
sample estimates:
```

```
rate ratio
```

```
0.2220779
```

```
> # Severe and moderate Anah asthma attacks ** "Poisson.Test" program
```

```
> poisson.test(c(3, 23), c(22, 19))
```

```
Comparison of Poisson rates
```

```
data: c(3, 23) time base: c(22, 19)
```

```
count1 = 3, expected count1 = 13.951, p-value = 1.15e-05
```

```
alternative hypothesis: true rate ratio is not equal to 1
```

```
95 percent confidence interval:
```

```
0.02165246 0.37285085
```

```
sample estimates:
```

```
rate ratio
```

```
0.1126482
```

```

> # All Anah asthma attacks ** negative binomial model

> Anah_All <- glm.nb(All~Group, data=Anah)

> summary(Anah_All)

Call:
glm.nb(formula = All ~ Group, data = Anah, init.theta = 0.3630726678,
       link = log)

Deviance Residuals:
    Min       1Q   Median       3Q      Max
-1.1445  -0.7402  -0.7402   0.2958   1.7691

Coefficients:
            Estimate Std. Error z value Pr(>|z|)
(Intercept)  0.6109     0.4166   1.467   0.1425
Group        -1.5047     0.6402  -2.350   0.0188 *
---
Signif. codes:  0 '***' 0.001 '**' 0.01 '*' 0.05 '.' 0.1 ' ' 1

(Dispersion parameter for Negative Binomial(0.3631) family taken to be 1)

Null deviance: 36.522  on 40  degrees of freedom
Residual deviance: 30.907  on 39  degrees of freedom
AIC: 109.77

Number of Fisher Scoring iterations: 1

            Theta: 0.363
            Std. Err.: 0.179

2 x log-likelihood: -103.767

> qt(0.975, 40)
[1] 2.021075

> logRRnbAll<-c(-1.5047, -1.5047-2.021*0.6402, -1.5047+2.021*0.6402)

> logRRnbAll
[1] -1.5047000 -2.7985442 -0.2108558

> exp(logRRnbAll)
[1] 0.22208391 0.06089865 0.80989084 # 95% CI is in bold

```

```

> # Severe and moderate Anah asthma attacks ** negative binomial model

> Anah_SevMod <- glm.nb(SevMod~Group, data=Anah)

> summary(Anah_SevMod)

Call:
glm.nb(formula = SevMod ~ Group, data = Anah, init.theta = 0.6089002017,
       link = log)

Deviance Residuals:
    Min       1Q   Median       3Q      Max
-1.1695  -1.1695  -0.4961   0.3262   1.2282

Coefficients:
            Estimate Std. Error z value Pr(>|z|)
(Intercept)  0.2336     0.3579   0.653  0.51394
Group        -2.2260     0.7322  -3.040  0.00236 **
---
Signif. codes:  0 '***' 0.001 '**' 0.01 '*' 0.05 '.' 0.1 ' ' 1

(Dispersion parameter for Negative Binomial(0.6089) family taken to be 1)

Null deviance: 39.703  on 40  degrees of freedom
Residual deviance: 28.221  on 39  degrees of freedom
AIC: 82.886

Number of Fisher Scoring iterations: 1

            Theta:  0.609
        Std. Err.:  0.406

2 x log-likelihood:  -76.886

> logRRnbSevMod<-c(-2.2260, -2.2260-2.021*0.7322, -2.2260+2.021*0.7322)

> logRRnbSevMod
[1] -2.2260000 -3.7057762 -0.7462238

> exp(logRRnbSevMod)
[1] 0.10795941 0.02458113 0.47415368 # 95%CI is in bold

```

## Histamine Log(PC20) measurements:

These four variables are measured from Bucca (1992) fig.1 (suppl file 2)

Cold\_pre: Participants had the common cold, level before vitamin C  
Cold\_post: Participants had the common cold, level after vitamin C  
Reco\_pre: Participants had recovered of the cold, level before vitamin C  
Reco\_post: Participants had recovered of the cold, level after vitamin C

These variables are calculated from the four above

Cold\_VC = Cold\_post - Cold\_pre (effect of vitamin C on common cold day)  
Reco\_VC = Reco\_post - Reco\_pre (effect of vitamin C on after recovery day)  
Diff\_VC = Cold\_VC - Reco\_VC (for analyzing the association on p.12)  
Reco\_pre\_VC = Reco\_pre - Diff\_VC (for analyzing the association on p.12)  
Diff\_VC\_10 = 10exp(Diff\_VC) (vit C effect on the absolute scale)  
Cold\_pre\_10 = 10exp(Cold\_pre) (baseline PC20 on the absolute scale)

> # reconstructed Bucca data set

> Bucca

|   | Person | Cold_pre | Cold_pre_10 | Cold_post | Cold_VC | Reco_pre | Reco_post | Reco_VC | Reco_pre_VC | Diff_VC | Diff_VC_10 |
|---|--------|----------|-------------|-----------|---------|----------|-----------|---------|-------------|---------|------------|
| 1 | 1      | 1.3480   | 22.2831     | 1.6971    | 0.3491  | 1.6682   | 1.9520    | 0.2838  | 1.6029      | 0.0652  | 1.1621     |
| 2 | 2      | 1.1355   | 13.6600     | 1.4146    | 0.2792  | 1.0926   | 1.3960    | 0.3034  | 1.1168      | -0.0242 | 0.9457     |
| 3 | 3      | 0.9812   | 9.5760      | 1.9114    | 0.9303  | 1.1024   | 1.6798    | 0.5775  | 0.7495      | 0.3528  | 2.2533     |
| 4 | 4      | 0.9052   | 8.0392      | 1.5554    | 0.6502  | 1.6756   | 1.9012    | 0.2256  | 1.2510      | 0.4246  | 2.6582     |
| 5 | 5      | 0.8880   | 7.7263      | 1.2706    | 0.3826  | 1.2021   | 1.1024    | -0.0997 | 0.7197      | 0.4824  | 3.0365     |
| 6 | 6      | 0.8633   | 7.2991      | 1.1653    | 0.3020  | 1.0860   | 1.0269    | -0.0592 | 0.7248      | 0.3612  | 2.2972     |
| 7 | 7      | 0.7756   | 5.9655      | 1.0800    | 0.3043  | 0.9504   | 1.1928    | 0.2424  | 0.8884      | 0.0620  | 1.1534     |
| 8 | 8      | 0.7053   | 5.0731      | 1.2301    | 0.5248  | 1.1406   | 1.2021    | 0.0615  | 0.6773      | 0.4633  | 2.9058     |
| 9 | 9      | 0.4597   | 2.8817      | 1.3317    | 0.8720  | 0.8292   | 1.1033    | 0.2740  | 0.2313      | 0.5980  | 3.9624     |

## Data for Bucca AOV calculations

Cold: pre vitamin C and post vitamin C measurements on "Common Cold" day  
Reco: pre vitamin C and post vitamin C measurements "After Recovery" day  
Group: measurement pre or post vitamin C administration

Pre: pre vit C measurements on "During Cold" and "After Recovery" (6 week) days  
GroupPre: day of the pre measurement ("During Cold" or "After Recovery")

> # Bucca data set for AOV calculations

> Bucca\_aov

|    | Cold   | Group     | Reco   | Pre    | GroupPre |
|----|--------|-----------|--------|--------|----------|
| 1  | 1.3480 | pre_vitC  | 1.6682 | 1.3480 | Cold     |
| 2  | 1.1355 | pre_vitC  | 1.0926 | 1.1355 | Cold     |
| 3  | 0.9812 | pre_vitC  | 1.1024 | 0.9812 | Cold     |
| 4  | 0.9052 | pre_vitC  | 1.6756 | 0.9052 | Cold     |
| 5  | 0.8880 | pre_vitC  | 1.2021 | 0.8880 | Cold     |
| 6  | 0.8633 | pre_vitC  | 1.0860 | 0.8633 | Cold     |
| 7  | 0.7756 | pre_vitC  | 0.9504 | 0.7756 | Cold     |
| 8  | 0.7053 | pre_vitC  | 1.1406 | 0.7053 | Cold     |
| 9  | 0.4597 | pre_vitC  | 0.8292 | 0.4597 | Cold     |
| 10 | 1.6971 | post_vitC | 1.9520 | 1.6682 | Reco     |
| 11 | 1.4146 | post_vitC | 1.3960 | 1.0926 | Reco     |
| 12 | 1.9114 | post_vitC | 1.6798 | 1.1024 | Reco     |
| 13 | 1.5554 | post_vitC | 1.9012 | 1.6756 | Reco     |
| 14 | 1.2706 | post_vitC | 1.1024 | 1.2021 | Reco     |
| 15 | 1.1653 | post_vitC | 1.0269 | 1.0860 | Reco     |
| 16 | 1.0800 | post_vitC | 1.1928 | 0.9504 | Reco     |
| 17 | 1.2301 | post_vitC | 1.2021 | 1.1406 | Reco     |
| 18 | 1.3317 | post_vitC | 1.1033 | 0.8292 | Reco     |

```

> # Bucca (1989) used Analysis of Variance [AOV] (corresponds to un-paired t-
test)
> # The appropriate comparison is by the paired t-test
> # The Bucca statistics are re-calculated to show that the reconstructed data
set gives the same F-statistics and to show that the Bucca calculations were un-
paired (should have been paired)

> # 1: AOV Comparison of pre vs. post vitamin C on the "During Cold" day

> aov.1 = aov(Cold~Group, data=Bucca_aov)

> summary(aov.1)
      Df Sum Sq Mean Sq F value    Pr(>F)
Group    1  1.173   1.1727   17.17 0.000764 ***
Residuals 16  1.093   0.0683

> # Bucca (1989) reported F = 17 which is consistent with the F value above

> # 1: UN-PAIRED t-test (corresponds to AOV)

> t.test(Bucca$Cold_post, Bucca$Cold_pre, alternative='two.sided',
conf.level=.95, paired=FALSE)

      Welch Two Sample t-test

data:  Bucca$Cold_post and Bucca$Cold_pre
t = 4.1434, df = 15.934, p-value = 0.00077
alternative hypothesis: true difference in means is not equal to 0
95 percent confidence interval:
 0.2492174 0.7717604
sample estimates:
mean of x mean of y
1.4062444 0.8957556

> # F = t*t > 17.1 = 4.14*4.14; AOV and un-paired t-test give the same result

> # 1: PAIRED t-test (the correct test for paired data)

> t.test(Bucca$Cold_post, Bucca$Cold_pre, alternative='two.sided',
conf.level=.95, paired=TRUE)

      Paired t-test

data:  Bucca$Cold_post and Bucca$Cold_pre
t = 6.0747, df = 8, p-value = 0.0002977
alternative hypothesis: true difference in means is not equal to 0
95 percent confidence interval:
 0.3167040 0.7042738
sample estimates:
mean of the differences
      0.5104889

> # 95% CI to absolute PC20 values for the "Common Cold day"
> log_PC20<-c(0.3167, 0.7042738, 0.5104889)
> log_PC20
[1] 0.3167000 0.7042738 0.5104889
> PC20<-10^(log_PC20)
> PC20
[1] 2.073481 5.061437 3.239581

```

```

> # 2: AOV of pre vs. post vit C on the "After Recovery" day (6 wk later)

> aov.2 = aov(Reco~Group, data=Bucca_aov)

> summary(aov.2)
      Df Sum Sq Mean Sq F value Pr(>F)
Group    1  0.1819   0.1819   1.698  0.211
Residuals 16  1.7144   0.1071

> # Bucca (1989) reported F = 1.7 which is consistent with the F value above

> # 2: UN-PAIRED t-test (corresponds to AOV)

> t.test(Bucca$Reco_post, Bucca$Reco_pre, alternative='two.sided',
conf.level=.95, paired=FALSE)

      Welch Two Sample t-test

data:  Bucca$Reco_post and Bucca$Reco_pre
t = 1.3029, df = 15.362, p-value = 0.2118
alternative hypothesis: true difference in means is not equal to 0
95 percent confidence interval:
 -0.1271803  0.5292692
sample estimates:
mean of x mean of y
 1.395167  1.194122

> # F = t*t > 1.7 = 1.3*1.3; AOV and un-paired t-test give the same result

> # 2: PAIRED t-test (the correct test for paired data)

> t.test(Bucca$Reco_post, Bucca$Reco_pre, alternative='two.sided',
conf.level=.95, paired=TRUE)

      Paired t-test

data:  Bucca$Reco_post and Bucca$Reco_pre
t = 2.9077, df = 8, p-value = 0.01966
alternative hypothesis: true difference in means is not equal to 0
95 percent confidence interval:
 0.04160047 0.36048842
sample estimates:
mean of the differences
 0.2010444

> # 95% CI to absolute PC20 values for the "After Recovery day"
> log_PC20_reco<-c(0.04163681, 0.36056319, 0.2011)
> log_PC20_reco
[1] 0.04163681 0.36056319 0.20110000
> PC20_reco<-10^(log_PC20_reco)
> PC20_reco
[1] 1.100619 2.293840 1.588913

> # Bucca (1989) reports that for the "being recovered" day, vitamin C effect
P>0.05
> # that is based on the AOV, whereas the paired t-test gives P=0.02 (above)

```



```
> # 3: AOV of pre vit C PC20 values on the "During Cold" and "After Recovery"
days
```

```
> aov.3 = aov(Pre~GroupPre, data=Bucca_aov)
```

```
> summary(aov.3)
```

```
      Df Sum Sq Mean Sq  F value Pr(>F)
GroupPre    1  0.4006   0.4006    5.369 0.0341 *
Residuals  16  1.1938   0.0746
```

```
> # Bucca (1989) reported F = 5.23 which is consistent with the F value above
```

```
> # 3: UN-PAIRED t-test (corresponds to AOV)
```

```
> t.test(Bucca$Cold_pre, Bucca$Reco_pre, alternative='two.sided',
conf.level=.95, paired=FALSE)
```

```
Welch Two Sample t-test
```

```
data:  Bucca$Cold_pre and Bucca$Reco_pre
t = -2.3171, df = 15.678, p-value = 0.03438
alternative hypothesis: true difference in means is not equal to 0
95 percent confidence interval:
 -0.57179828 -0.02493506
sample estimates:
mean of x mean of y
0.8957556 1.1941222
```

```
> # F = t*t > 5.38 = 2.32*2.32; AOV and un-paired t-test give the same result
```

```
> # 3: PAIRED t-test (the correct test for paired data)
```

```
> t.test(Bucca$Cold_pre, Bucca$Reco_pre, alternative='two.sided',
conf.level=.95, paired=TRUE)
```

```
Paired t-test
```

```
data:  Bucca$Cold_pre and Bucca$Reco_pre
t = -3.9244, df = 8, p-value = 0.004391
alternative hypothesis: true difference in means is not equal to 0
95 percent confidence interval:
 -0.4736911 -0.1230422
sample estimates:
mean of the differences
 -0.2983667
```

```
> log_PC20_pre_diff<-c(-0.4736911, -0.1230422, -0.2983667)
```

```
> log_PC20_pre_diff
```

```
[1] -0.4736911 -0.1230422 -0.2983667
```

```
> PC20_pre_diff<-10^(log_PC20_pre_diff)
```

```
> PC20_pre_diff
```

```
[1] 0.3359765 0.7532824 0.5030757
```

```

> # Interaction test: difference in the vitamin C effect between the "During
Cold" and "After Recovery" days

> # Small P-value means that the effect of vitamin C on the two study days is
different

> t.test(Bucca$Cold_VC, Bucca$Reco_VC, alternative='two.sided', conf.level=.95,
paired=TRUE)

```

Paired t-test

```

data: Bucca$Cold_VC and Bucca$Reco_VC
t = 4.222, df = 8, p-value = 0.002908
alternative hypothesis: true difference in means is not equal to 0
95 percent confidence interval:
 0.1404389 0.4784944
sample estimates:
mean of the differences
      0.3094667

```

```

> #the t-test above is identical with the linear model:

```

```

> LinearModel.1 <- lm(Cold_VC - Reco_VC ~ 1, data=Bucca)

```

```

> summary(LinearModel.1)

```

Call:

```
lm(formula = Cold_VC - Reco_VC ~ 1, data = Bucca)
```

Residuals:

| Min      | 1Q       | Median  | 3Q      | Max     |
|----------|----------|---------|---------|---------|
| -0.33367 | -0.24417 | 0.05173 | 0.15383 | 0.28853 |

Coefficients:

|             | Estimate | Std. Error | t value | Pr(> t )   |
|-------------|----------|------------|---------|------------|
| (Intercept) | 0.3095   | 0.0733     | 4.222   | 0.00291 ** |

Residual standard error: 0.2199 on 8 degrees of freedom

```

> # and this is identical with (since Diff_VC = Cold_VC - Reco_VC, see p. 6)

```

```

> LinearModel.2 <- lm(Diff_VC ~ 1, data=Bucca)

```

```

> summary(LinearModel.2)

```

Call:

```
lm(formula = Diff_VC ~ 1, data = Bucca)
```

Residuals:

| Min      | 1Q       | Median  | 3Q      | Max     |
|----------|----------|---------|---------|---------|
| -0.33368 | -0.24428 | 0.05172 | 0.15382 | 0.28852 |

Coefficients:

|             | Estimate | Std. Error | t value | Pr(> t )   |
|-------------|----------|------------|---------|------------|
| (Intercept) | 0.3095   | 0.0733     | 4.222   | 0.00291 ** |

Residual standard error: 0.2199 on 8 degrees of freedom

**Models 1 and 2 are the basis for a further model on pages 15 and 16**

```
> # Correlation of PC20 values BEFORE vit C on the "During Cold" and "After Recovery" days
```

```
> cor.test(Bucca$Cold_pre, Bucca$Reco_pre, alternative="two.sided", method="pearson")
```

Pearson's product-moment correlation

```
data: Bucca$Cold_pre and Bucca$Reco_pre
t = 2.313, df = 7, p-value = 0.05395
alternative hypothesis: true correlation is not equal to 0
95 percent confidence interval:
-0.01056197 0.92010969
sample estimates:
cor
0.6581765
```

```
> # Correlation of PC20 values AFTER vit C on the "During Cold" and "After Recovery" days
```

```
> cor.test(Bucca$Cold_post, Bucca$Reco_post, alternative="two.sided", method="pearson")
```

Pearson's product-moment correlation

```
data: Bucca$Cold_post and Bucca$Reco_post
t = 3.7229, df = 7, p-value = 0.007428
alternative hypothesis: true correlation is not equal to 0
95 percent confidence interval:
0.3292318 0.9597136
sample estimates:
cor
0.8151262
```

Since (see p. 6)  
Cold\_post = [Cold\_pre + Cold\_VC]  
Reco\_post = [Reco\_pre + Reco\_VC]

**This indicates that the correlation after vitamin C**  
**Cold\_post <> Bucca\$Reco\_post**  
**is identical with**  
**[Cold\_pre + Cold\_VC] <> [Reco\_pre + Reco\_VC]**

Since both sides have the vitamin C effect, they can be combined to  
the difference [Cold\_VC - Reco\_VC] = Diff\_VC  
Thus, the above correlation is related to the correlation

Cold\_pre <> Reco\_pre - Diff\_VC

This correlation can be tested with linear regression

Let variable (p. 6)  
Reco\_pre\_VC = [Reco\_pre - (Cold\_VC - Reco\_VC)] = [Reco\_pre - Diff\_VC]

**> # Correlation of log(PC20) values BEFORE vit C on the "During Cold" and**  
**Reco\_pre\_VC**

> cor.test(Bucca\$Cold\_pre, Bucca\$Reco\_pre\_VC, alternative="two.sided",  
method="pearson")

Pearson's product-moment correlation

data: Bucca\$Cold\_pre and Bucca\$Reco\_pre\_VC  
t = 4.9229, df = 7, p-value = 0.001708  
alternative hypothesis: true correlation is not equal to 0  
95 percent confidence interval:  
0.5222220 0.9747504  
sample estimates:  
cor  
**0.8808487**

**Thus, PC20 level before vitamin C administration on the "During Cold" day can be explained by the PC20 level before vitamin C on the "After Recovery" day and the difference in the vitamin C effects on the two days.**

This approach allows testing the influence of vitamin C on the association between the PC20 levels on the two days ("During Cold" and "After Recovery").

On the next page, models 11 and 12 test whether the addition of Diff\_VC to the linear model which has the Reco\_pre variable improves the fit.

```
> # Below, the baseline log(PC20) level on the "During Cold" day is explained by
the baseline log(PC20) level on the "After Recovery" day
```

```
> LinearModel.11 <- lm(Bucca$Cold_pre ~ 1 + Bucca$Reco_pre , data=Bucca)
> summary(LinearModel.11)
```

Call:

```
lm(formula = Bucca$Cold_pre ~ 1 + Bucca$Reco_pre, data = Bucca)
```

Residuals:

```
      Min       1Q   Median       3Q      Max
-0.2649 -0.1600  0.0187  0.1377  0.2976
```

Coefficients:

```
              Estimate Std. Error t value Pr(>|t|)
(Intercept)      0.2154     0.3018   0.714   0.4985
Bucca$Reco_pre   0.5697     0.2463   2.313   0.0539 .
```

```
Residual standard error: 0.2035 on 7 degrees of freedom
Multiple R-squared: 0.4332, Adjusted R-squared: 0.3522
F-statistic: 5.35 on 1 and 7 DF, p-value: 0.05395
```

```
> # Below, the difference in vitamin C effects is added to model 1 above
```

```
> LinearModel.12 <- lm(Bucca$Cold_pre ~ 1 + Bucca$Reco_pre + Bucca$Diff_VC ,
data=Bucca)
> summary(LinearModel.12)
```

Call:

```
lm(formula = Bucca$Cold_pre ~ 1 + Bucca$Reco_pre + Bucca$Diff_VC,
    data = Bucca)
```

Residuals:

```
      Min       1Q   Median       3Q      Max
-0.17733 -0.05837  0.05335  0.05571  0.15985
```

Coefficients:

```
              Estimate Std. Error t value Pr(>|t|)
(Intercept)      0.5411     0.2195   2.465   0.0488 *
Bucca$Reco_pre   0.4792     0.1620   2.959   0.0253 *
Bucca$Diff_VC   -0.7030     0.2151  -3.268   0.0171 *
```

```
Residual standard error: 0.1318 on 6 degrees of freedom
Multiple R-squared: 0.7961, Adjusted R-squared: 0.7282
F-statistic: 11.71 on 2 and 6 DF, p-value: 0.008476
```

```
> # likelihood ratio test of the models 11 and 12 above
```

```
> # see rationalization: http://en.wikipedia.org/wiki/Likelihood-ratio\_test
```

```
> # small P-value means that the added variable improves the association
```

```
> lrtest(LinearModel.11,LinearModel.12)
```

Likelihood ratio test

Model 1: Bucca\$Cold\_pre ~ 1 + Bucca\$Reco\_pre

Model 2: Bucca\$Cold\_pre ~ 1 + Bucca\$Reco\_pre + Bucca\$Diff\_VC

```
#Df LogLik Df Chisq Pr(>Chisq)
```

```
1 3 2.690
```

```
2 4 7.291 1 9.202 0.002418 **
```

```
> # What can explain the effect of vitamin C on the common cold day.
i.e. the variable Cold_VC ?

> LinearModel.21 <- lm( Bucca$Cold_VC ~ 1 + Bucca$Cold_pre + Bucca$Reco_pre +
Bucca$Reco_VC , data=Bucca)
> summary(LinearModel.21)
```

```
Call:
lm(formula = Bucca$Cold_VC ~ 1 + Bucca$Cold_pre + Bucca$Reco_pre +
    Bucca$Reco_VC, data = Bucca)
```

Coefficients:

|                 | Estimate | Std. Error | t value | Pr(> t ) |
|-----------------|----------|------------|---------|----------|
| (Intercept)     | 0.6698   | 0.2533     | 2.645   | 0.0457 * |
| Bucca\$Cold_pre | -0.8842  | 0.3171     | -2.788  | 0.0385 * |
| Bucca\$Reco_pre | 0.3754   | 0.2674     | 1.404   | 0.2193   |
| Bucca\$Reco_VC  | 0.9176   | 0.2909     | 3.154   | 0.0253 * |

```
Residual standard error: 0.1631 on 5 degrees of freedom
Multiple R-squared: 0.7385, Adjusted R-squared: 0.5816
F-statistic: 4.707 on 3 and 5 DF, p-value: 0.0642
```

```
> LinearModel.22 <- lm( Bucca$Cold_VC ~ 1 + Bucca$Cold_pre + Bucca$Reco_VC ,
data=Bucca)
> summary(LinearModel.22)
```

```
Call:
lm(formula = Bucca$Cold_VC ~ 1 + Bucca$Cold_pre + Bucca$Reco_VC,
    data = Bucca)
```

Coefficients:

|                 | Estimate | Std. Error | t value | Pr(> t )   |
|-----------------|----------|------------|---------|------------|
| (Intercept)     | 0.8652   | 0.2281     | 3.793   | 0.00904 ** |
| Bucca\$Cold_pre | -0.5840  | 0.2524     | -2.314  | 0.05995 .  |
| Bucca\$Reco_VC  | 0.8377   | 0.3075     | 2.724   | 0.03446 *  |

```
Residual standard error: 0.1758 on 6 degrees of freedom
Multiple R-squared: 0.6354, Adjusted R-squared: 0.5139
F-statistic: 5.229 on 2 and 6 DF, p-value: 0.04846
```

```
> lrtest(LinearModel.21,LinearModel.22)
Likelihood ratio test
```

```
Model 1: Bucca$Cold_VC ~ 1 + Bucca$Cold_pre + Bucca$Reco_pre + Bucca$Reco_VC
Model 2: Bucca$Cold_VC ~ 1 + Bucca$Cold_pre + Bucca$Reco_VC
#Df LogLik Df Chisq Pr(>Chisq)
1 5 6.1962
2 4 4.7006 -1 2.9913 0.08371 .
```

```
> # thus, Reco_pre (baseline PC20 on the "after recovery" day) is unimportant
```

```

> LinearModel.23 <- lm( Bucca$Cold_VC ~ 1 , data=Bucca)

> summary(LinearModel.23)

Call:
lm(formula = Bucca$Cold_VC ~ 1, data = Bucca)

Coefficients:
              Estimate Std. Error t value Pr(>|t|)
(Intercept)  0.51050     0.08404   6.074 0.000298 ***

Residual standard error: 0.2521 on 8 degrees of freedom

> lrtest(LinearModel.22,LinearModel.23)
Likelihood ratio test

Model 1: Bucca$Cold_VC ~ 1 + Bucca$Cold_pre + Bucca$Reco_VC
Model 2: Bucca$Cold_VC ~ 1
  #Df LogLik Df Chisq Pr(>Chisq)
1    4 4.7006
2    2 0.1601 -2 9.081   0.01067 *

> # thus, baseline PC20 on the "common cold day" and the vitamin C effect on the
"after recovery day" explain the vitamin C effect on the "common cold day"

```

```
> # when the vitamin C effects are combined to the difference Diff_VC we get the following models 31 and 32:
```

```
> LinearModel.31 <- lm(Bucca$Diff_VC ~ 1 , data=Bucca)
```

```
> summary(LinearModel.31)
```

```
Call:
```

```
lm(formula = Bucca$Diff_VC ~ 1, data = Bucca)
```

```
Coefficients:
```

|             | Estimate | Std. Error | t value | Pr(> t )   |
|-------------|----------|------------|---------|------------|
| (Intercept) | 0.3095   | 0.0733     | 4.222   | 0.00291 ** |

```
Residual standard error: 0.2199 on 8 degrees of freedom
```

```
> # LinearModel.31 is identical with LinearModel.1 above,  
> # because Diff_VC = Cold_VC - Reco_VC  
> # thus 31 is the test of interaction between the two days
```

```
> #addition of the baseline histamine sensitivity on the common cold day
```

```
> LinearModel.32 <- lm(Bucca$Diff_VC ~ 1 + Bucca$Cold_pre , data=Bucca)
```

```
> summary(LinearModel.32)
```

```
Call:
```

```
lm(formula = Bucca$Diff_VC ~ 1 + Bucca$Cold_pre, data = Bucca)
```

```
Coefficients:
```

|                 | Estimate | Std. Error | t value | Pr(> t )  |
|-----------------|----------|------------|---------|-----------|
| (Intercept)     | 0.8596   | 0.2158     | 3.984   | 0.0053 ** |
| Bucca\$Cold_pre | -0.6142  | 0.2328     | -2.638  | 0.0335 *  |

```
Residual standard error: 0.1665 on 7 degrees of freedom
```

```
Multiple R-squared: 0.4986, Adjusted R-squared: 0.427
```

```
F-statistic: 6.961 on 1 and 7 DF, p-value: 0.0335
```

```
> lrtest(LinearModel.31,LinearModel.32)
```

```
Likelihood ratio test
```

```
Model 1: Bucca$Diff_VC ~ 1
```

```
Model 2: Bucca$Diff_VC ~ 1 + Bucca$Cold_pre
```

```
#Df LogLik Df Chisq Pr(>Chisq)
```

```
1 2 1.3905
```

```
2 3 4.4973 1 6.2135 0.01268 *
```

```
> # thus baseline histamine PC20 significantly improves the fit of the model
```
